# Supplementary material for: The paeonol target gene autophagy-related 5 has a potential therapeutic value in psoriasis treatment
Source: PeerJ. 2021 May 25;9:e11278. doi: 10.7717/peerj.11278 (PMC8162242; doi:10.7717/peerj.11278)
Supplement: Supplemental Information 6 [file peerj-09-11278-s006.xlsx]

## Sheet: Sheet1
Figure 6A	Control			Model			Model+paeonol
0 h	0.2674	0.01534	3	0.31566	0.03247	3	0.26348	0.0377	3
12 h	0.37463	0.01779	3	0.399806	0.028746	3	0.36065	0.04754	3
24 h	0.51397	0.02539	3	0.750308	0.023372	3	0.63279	0.108886	3
Figure 6B	Control			Model			Model+paeonol
	1.04727	0.10527	3	1.64244	0.011276	3	1.33168	0.036667	3
Figure 6C	Control			Model			Model+paeonol
	1.01067	0.049737	3	2.67912	0.059438	3	1.31667	0.34971	3
Figure 6D	Control			Model			Model+paeonol
	1.01254	0.065794	3	2.46348	0.17138	3	1.46711	0.113657	3
Figure 6E	Control			Model			Model+paeonol
	47.6137	6.16667	3	127.65	18.6333	3	85.3562	18.3468	3
Figure 6F	Control			Model			Model+paeonol
	19.3584	1.66667	3	42.3167	2.94816	3	28.6347	4.71396	3
Figure 6H	Control			Model			Model+paeonol
	4.58	0.472	3	3.35798	0.07077	3	4.175	0.3346	3
Figure 7A	Control			Model			Model+NC			Model+paeonol			Model+si-ATG5			Model+paeonol+si-ATG5			Model+pc-ATG5			Model+paeonol+pc-ATG5
	0.94472	1.02	1.02	1.6541	1.723	1.645	1.621	1.946	1.7912	1.24	1.287	1.2546	0.325	0.33	0.341	0.3345	0.4133	0.30431	2.8546	2.3469	2.56749	2.6497	2.6414	2.2456
Figure 7B	Control			Model			Model+NC			Model+paeonol			Model+si-ATG5			Model+paeonol+si-ATG5			Model+pc-ATG5			Model+paeonol+pc-ATG5
	25.3136	27.6746	29.1987	53.6132	69.1462	56.6117	58.1647	53.4674	49.4667	36.437	40.56	34	78.6667	69.3404	72.1679	68.6787	72.3647	64.4235	16.4467	20.1597	14.0158	26.3167	21.4594	24.0642
Figure 7C	Control			Model			Model+NC			Model+paeonol			Model+si-ATG5			Model+paeonol+si-ATG5			Model+pc-ATG5			Model+paeonol+pc-ATG5
	48.9164	52.6716	43.1034	103.377	148.223	133.657	125.365	137.164	107.465	79.7137	85.7347	67.3333	167.115	154.213	163.349	127.181	114.272	153.426	38.164	45.6667	42.1111	41.1167	35.1675	48.6794
Figure 8A	Control			Model			Model+NC			Model+paeonol			Model+si-ATG5			Model+paeonol+si-ATG5			Model+pc-ATG5			Model+paeonol+pc-ATG5
	0.58331	0.020599	3	0.7903	0.0252	3	0.7502	0.0206	3	0.654	0.0094	3	0.4524	0.0178	3	0.4524	0.078	3	0.5644	0.034	3	0.6134	0.0078	3
Figure 8B	Control			Model			Model+NC			Model+paeonol			Model+si-ATG5			Model+paeonol+si-ATG5			Model+pc-ATG5			Model+paeonol+pc-ATG5
	4.275	4.346	3.9841	3.95798	3.877	3.6727	4.145	3.346	3.66925	4.567	4.5414	4.13	15.4667	14.546	13.3411	11.6667	16.5667	13.3333	5.12121	6.64812	4.3164	3.1679	4.5648	5.1346
Figure 9B	Control			Model			Model+NC			Model+paeonol			Model+si-ATG5			Model+paeonol+si-ATG5			Model+pc-ATG5			Model+paeonol+pc-ATG5
	1.2	1.0341	0.96011	1.56	1.64	1.6051	1.45104	1.62613	1.5649	1.122	1.098	1.23	0.39147	0.4331	0.34125	0.5674	0.65122	0.44248	2.04841	2.09115	2.2667	1.785	2.487	2.175
Figure 9C	Control			Model			Model+NC			Model+paeonol			Model+si-ATG5			Model+paeonol+si-ATG5			Model+pc-ATG5			Model+paeonol+pc-ATG5
	1.02456	1.02476	0.99874	1.6812	1.5489	1.60541	1.54649	1.74317	1.50367	1.12165	1.34345	1.2234	0.45213	0.43346	0.41647	0.55213	0.53346	0.41542	2.0314	2.3147	2.3167	2.574	1.674	2.2464
Figure 9D	Control			Model			Model+NC			Model+paeonol			Model+si-ATG5			Model+paeonol+si-ATG5			Model+pc-ATG5			Model+paeonol+pc-ATG5
	1.0006	1.0276	0.84574	1.5722	1.54464	1.54148	1.54634	1.43165	1.5625	1.2137	1.4364	1.3264	0.3564	0.4366	0.4127	0.52147	0.53466	0.54572	2.01674	1.6747	2.2464	1.978	1.8974	1.9457
